# Supplementary material for: Scale Up and Validation of Novel Tri-Bore PVDF Hollow Fiber Membranes for Membrane Distillation Application in Desalination and Industrial Wastewater Recycling
Source: MDPI journal article supplement (doi:10.3390/membranes12060573), 2022-05-30
Supplement: s1 [file s1]

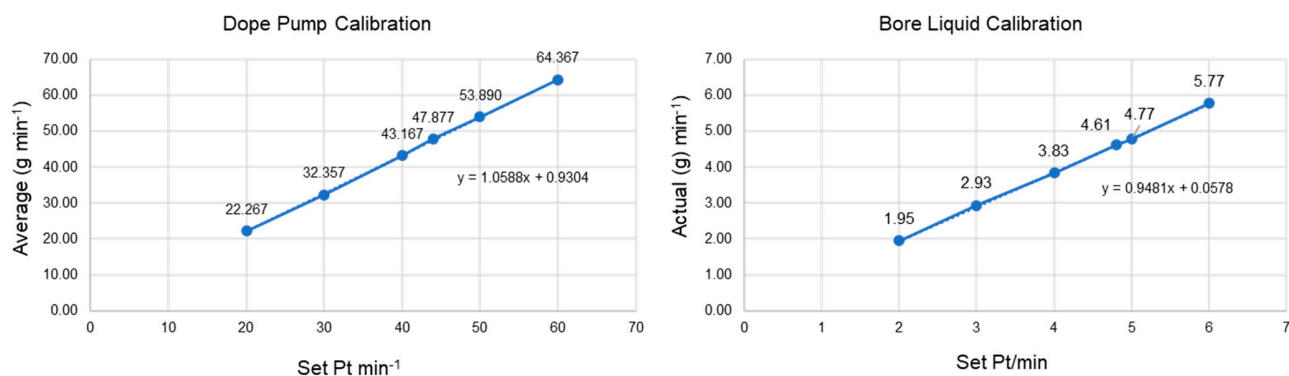

Figure S1. The calibration of the (a) dope pump and (b) bore liquid pump, as part of the membrane fabrication scale up process.

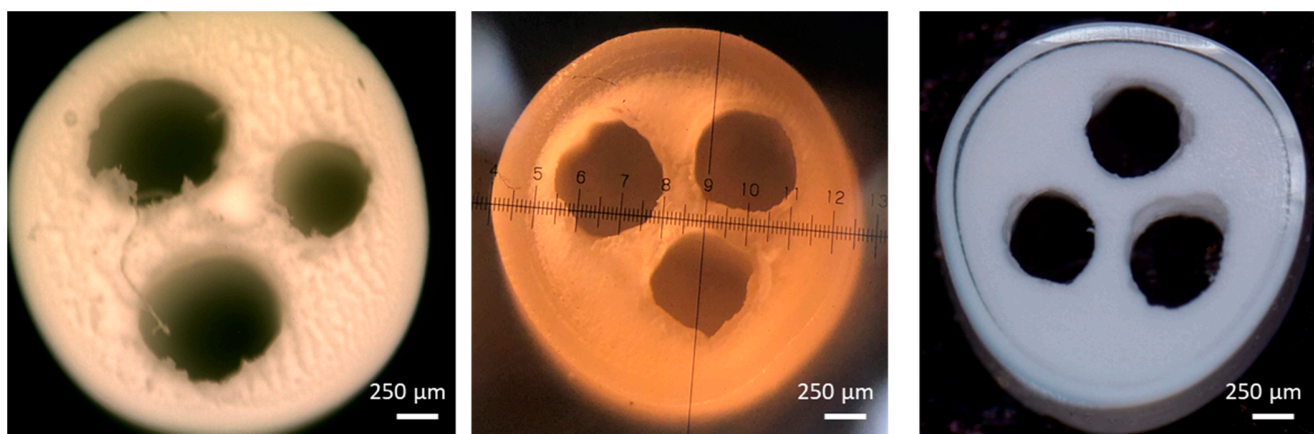

Figure S2. The optical microscope images used for determining the outer diameter (OD) and inner diameter (ID) of the tri-bore hollow fiber membranes.

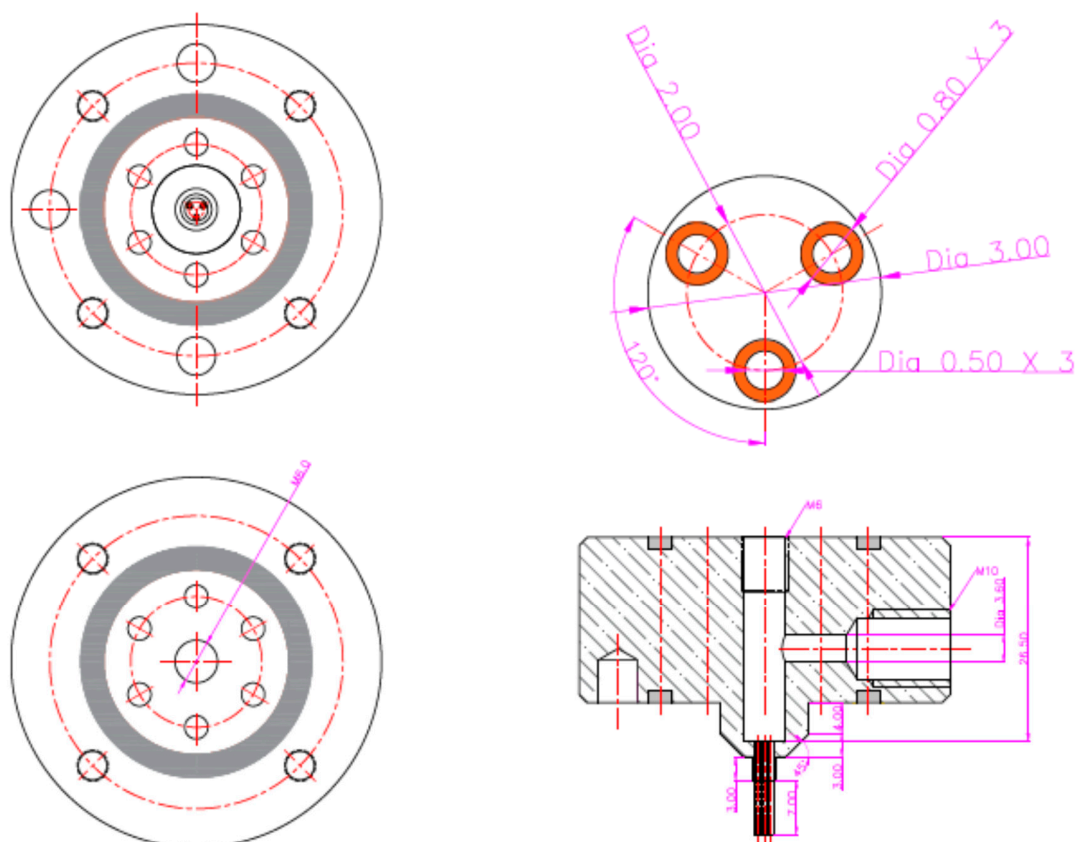

Figure S3. Spinneret design used for fabricating the tri-bore hollowfiber membrane.

Table S1. Porosity (%), contact angle (°), DCMD flux ( $\text{L m}^{-2} \text{h}^{-1}$ ) and liquid entry pressure,  $\text{LEP}_w$  (bar) of different batches of 1.5 kg size.

| Batch No           | Batch Size | Porosity (%)   | Contact angle (°) | $\text{LEP}_w$ (Bar) | DCMD Flux ( $\text{L m}^{-2} \text{h}^{-1}$ ) | Rejection (%) |
|--------------------|------------|----------------|-------------------|----------------------|-----------------------------------------------|---------------|
| 1                  | 1.5 kg     | $72.8 \pm 1.3$ | $80.3 \pm 3.1$    | $2.5 \pm 0.1$        | $13.8 \pm 0.3$                                | >99.9         |
| 2                  | 1.5 kg     | $72.4 \pm 0.7$ | $80.2 \pm 9.8$    | $2.6 \pm 0.2$        | $13.3 \pm 0.3$                                | >99.8         |
| 3                  | 1.5 kg     | $75.4 \pm 0.0$ | $92.8 \pm 0.7$    | $2.6 \pm 0.2$        | $14 \pm 0.3$                                  | >99.9         |
| 4                  | 1.5 kg     | $74.5 \pm 0.7$ | $78.3 \pm 3.5$    | $2.6 \pm 0.1$        | $13.8 \pm 0.3$                                | >99.9         |
| 5                  | 1.5 kg     | $69.0 \pm 0.9$ | $78.9 \pm 8.1$    | $2.7 \pm 0.3$        | $13 \pm 0.5$                                  | >99.9         |
| Average            |            | 72.8           | 82.1              | 2.6                  | 13.6                                          | 99.8          |
| Standard Deviation |            | 2.5            | 6.0               | 0.1                  | 0.4                                           | 0.1           |

Table S2. Raw data for DCMD optimization trials for PVDF TBHF membranes.

| Module No | Test Mode        | Membrane area (m <sup>2</sup> ) | Hot Flowrate (ml min <sup>-1</sup> ) | Cold flowrate (ml min <sup>-1</sup> ) | T hot in (°C) | T hot out (°C) | T Cold in (°C) | T Cold out (°C) | Flux (L m <sup>-2</sup> h <sup>-1</sup> ) |
|-----------|------------------|---------------------------------|--------------------------------------|---------------------------------------|---------------|----------------|----------------|-----------------|-------------------------------------------|
| SN-1      | DCMD (Out-to-In) | 0.7                             | 2000                                 | 500                                   | 81.9          | 62.6           | 11.1           | 75.9            | 1.92                                      |
| SN-1      | DCMD (Out-to-In) | 0.7                             | 2000                                 | 500                                   | 78.7          | 61.1           | 11.9           | 72.6            | 1.17                                      |
| SN-2      | DCMD (In-to-Out) | 0.7                             | 3000                                 | 1500                                  | 80.5          | 63.4           | 22.8           | 59.9            | 1.34                                      |
| SN-2      | DCMD (Out-to-In) | 0.7                             | 3000                                 | 1500                                  | 80.0          | 63.6           | 22.5           | 56.5            | 1.23                                      |
| SN-3      | DCMD (Out-to-In) | 0.38                            | 2000                                 | 1500                                  | 80.3          | 66.8           | 23.6           | 52.5            | 2.03                                      |
| SN-3      | DCMD (Out-to-In) | 0.38                            | 2000                                 | 1500                                  | 80.8          | 67.5           | 24.2           | 52.6            | 1.96                                      |
| SN-3      | DCMD (Out-to-In) | 0.38                            | 2000                                 | 500                                   | 81.6          | 73.6           | 11.6           | 66.7            | 2.78                                      |
| SN-3      | DCMD (Out-to-In) | 0.38                            | 2000                                 | 700                                   | 81.3          | 72.2           | 12.9           | 55.1            | 2.65                                      |
| SN-5      | DCMD (Out-to-In) | 0.26                            | 2000                                 | 500                                   | 80.1          | 76.2           | 14.2           | 55.6            | 4.80                                      |
| SN-5      | DCMD (Out-to-In) | 0.26                            | 2000                                 | 500                                   | 80.9          | 76.9           | 13.4           | 54.9            | 4.83                                      |
| SN-5      | DCMD (Out-to-In) | 0.26                            | 2000                                 | 700                                   | 80.6          | 74.8           | 13.5           | 46.0            | 4.69                                      |
| SN-5      | DCMD (Out-to-In) | 0.26                            | 2000                                 | 700                                   | 80.8          | 74.6           | 13.6           | 46.1            | 4.64                                      |
| SN-5      | DCMD (Out-to-In) | 0.26                            | 2000                                 | 500                                   | 81.9          | 76.8           | 13.6           | 55.1            | 4.63                                      |
| SN-5      | DCMD (Out-to-In) | 0.26                            | 2000                                 | 1000                                  | 80.9          | 74.4           | 13.3           | 40.4            | 4.80                                      |
| SN-5      | DCMD (Out-to-In) | 0.26                            | 2000                                 | 1000                                  | 80.9          | 74.8           | 15.5           | 41.7            | 4.68                                      |
| SN-6      | DCMD (Out-to-In) | 0.26                            | 2000                                 | 500                                   | 81.1          | 69.4           | 13.7           | 52.0            | 2.81                                      |
| SN-6      | DCMD (Out-to-In) | 0.31                            | 2000                                 | 700                                   | 79.9          | 66.9           | 15.5           | 43.5            | 2.69                                      |
| SN-6      | DCMD (Out-to-In) | 0.31                            | 2000                                 | 700                                   | 81.1          | 67.3           | 14.0           | 42.7            | 2.65                                      |
| SN-6      | DCMD (Out-to-In) | 0.31                            | 2000                                 | 500                                   | 81.2          | 68.4           | 14.0           | 49.2            | 2.56                                      |
| SN-6      | DCMD (Out-to-In) | 0.31                            | 2000                                 | 500                                   | 80.6          | 68.2           | 11.6           | 48.6            | 2.46                                      |

Table S3. Raw data for the VMD optimization trials for PVDF TBHF membranes.

| Module No | Test Mode         | Membrane area (m <sup>2</sup> ) | Hot Flowrate (ml min <sup>-1</sup> ) | T hot in (°C) | T hot out (°C) | T Vapor Out (°C) | Vacuum pressure (bar) | Flux (L m <sup>-2</sup> h <sup>-1</sup> ) |
|-----------|-------------------|---------------------------------|--------------------------------------|---------------|----------------|------------------|-----------------------|-------------------------------------------|
| SN-2      | VMD(Out-to-In)    | 0.7                             | 3000                                 | 82.8          | 77.8           | 76.1             | -0.4                  | 1.11                                      |
| SN-2      | VMD(Out-to-In)    | 0.7                             | 3000                                 | 83.5          | 77.5           | 78.4             | -0.4                  | 0.96                                      |
| SN-2      | VMD(Out-to-In)    | 0.7                             | 3000                                 | 81.6          | 73.4           | 75.1             | -0.35                 | 1.21                                      |
| SN-2      | VMD(Out-to-In)    | 0.7                             | 3000                                 | 81.8          | 63.5           | 78.0             | -0.21                 | 0.84                                      |
| SN-2      | VMD(Out-to-In)    | 0.7                             | 3000                                 | 82.5          | 75.8           | 78.2             | -0.4                  | 0.11                                      |
| SN-2      | VMD(Out-to-In)    | 0.7                             | 3000                                 | 83.1          | 78.9           | 83.2             | -0.6                  | 0.67                                      |
| SN-2      | VMD(Out-to-In)    | 0.7                             | 3000                                 | 82.3          | 77.3           | 78.4             | -0.7                  | 1.13                                      |
| SN-3      | VMD(Out-to-In)    | 0.38                            | 3000                                 | 81.4          | 81.1           | 72.4             | -0.7                  | 1.99                                      |
| SN-3      | VMD(Out-to-In)    | 0.38                            | 3000                                 | 80.7          | 79.3           | 71.3             | -0.7                  | 3.83                                      |
| SN-3      | VMD(Out-to-In)    | 0.38                            | 3000                                 | 81.6          | 80.1           | 73.1             | -0.4                  | 1.78                                      |
| SN-3      | VMD(Out-to-In)    | 0.38                            | 3000                                 | 80.5          | 78.8           | 70.3             | -0.4                  | 2.20                                      |
| SN-3      | VMD(Out-to-In)    | 0.38                            | 3000                                 | 80.8          | 79.4           | 70.6             | -0.3                  | 2.09                                      |
| SN-3      | VMD(Out-to-In)    | 0.38                            | 3000                                 | 81.4          | 79.8           | 71.2             | -0.7                  | 2.04                                      |
| SN-3      | VMD(Out-to-In)    | 0.38                            | 3000                                 | 81.8          | 80.2           | 70.9             | -0.7                  | 2.25                                      |
| SN-3      | VMD(Out-to-In)    | 0.38                            | 3000                                 | 80.9          | 79.4           | 69.5             | -0.7                  | 2.35                                      |
| SN-3      | VMD(Out-to-In)    | 0.38                            | 3000                                 | 81.7          | 80.0           | 70.0             | -0.7                  | 2.18                                      |
| SN-3      | VMD(In-to-Out)    | 0.38                            | 3000                                 | 80.4          | 74.7           | 71.6             | -0.7                  | 3.87                                      |
| SN-3      | VMD(In-to-Out)    | 0.38                            | 3000                                 | 81.1          | 75.2           | 71.8             | -0.7                  | 3.90                                      |
| SN-2      | VMD(In-to-Out)    | 0.7                             | 3000                                 | 81.2          | 74.0           | 73.1             | -0.7                  | 2.48                                      |
| SN-2      | VMD(In-to-Out)    | 0.7                             | 3000                                 | 81.1          | 71.9           | 70.0             | -0.7                  | 3.59                                      |
| SN-2      | VMD(In-to-Out)    | 0.7                             | 3000                                 | 80.9          | 72.1           | 70.4             | -0.7                  | 3.60                                      |
| SN-2      | VMD(In-to-Out)    | 0.7                             | 3000                                 | 81.2          | 72.0           | 70.3             | -0.7                  | 3.48                                      |
| SN-6      | VMD(Out-to-in)    | 0.7                             | 3000                                 | 80.6          | 76.6           | 70.8             | -0.7                  | 1.58                                      |
| SN-6      | VMD Double Outlet | 0.31                            | 3000                                 | 80.2          | 76.2           | 70.4             | -0.7                  | 1.84                                      |
| SN-3      | VMD Double Outlet | 0.31                            | 4000                                 | 80.9          | 76.0           | 71.7             | -0.7                  | 2.58                                      |
| SN-3      | VMD Double Outlet | 0.38                            | 5000                                 | 89.8          | 86.5           | 74.3             | -0.7                  | 4.75                                      |
| SN-3      | VMD Double Outlet | 0.38                            | 6000                                 | 90.4          | 86.5           | 74.5             | -0.7                  | 5.18                                      |
| SN-3      | VMD Double Outlet | 0.38                            | 6000                                 | 94.8          | 90.7           | 77.2             | -0.7                  | 6.21                                      |
| SN-3      | VMD Double Outlet | 0.38                            | 6000                                 | 89.9          | 85.2           | 69.6             | -0.76                 | 5.91                                      |
| SN-3      | VMD Double Outlet | 0.38                            | 6000                                 | 90.1          | 85.0           | 65.3             | -0.81                 | 6.97                                      |
| SN-4      | VMD(In-to-Out)    | 0.38                            | 3000                                 | 81.1          | 73.6           | 68.3             | -0.73                 | 4.43                                      |
| SN-4      | VMD(In-to-Out)    | 0.38                            | 3000                                 | 81.4          | 72.8           | 67.3             | -0.74                 | 5.04                                      |
| SN-4      | VMD(Out-to-In)    | 0.38                            | 3000                                 | 80.4          | 78.2           | 72.4             | -0.71                 | 2.68                                      |
| SN-4      | VMD(Out-to-In)    | 0.38                            | 3000                                 | 80.7          | 76.8           | 67.9             | -0.75                 | 2.66                                      |
